# Supplementary material for: Identifying Replicable Subgroups in Neurodevelopmental Conditions Using Resting-State Functional Magnetic Resonance Imaging Data
Source: PubMed Central journal article supplement (PMC10011941; doi:10.1001/jamanetworkopen.2023.2066), 2023-03-13
Supplement: jamanetwopen-e232066-s002.pdf [file jamanetwopen-e232066-s002.pdf]

## Data Sharing Statement

Vandewouw. Identifying Replicable Subgroups in Neurodevelopmental Conditions Using Resting-State Functional Magnetic Resonance Imaging Data. *JAMA Netw Open*. Published March 13, 2023. doi:10.1001/jamanetworkopen.2023.2066

### Data

**Data available:** Yes

**Data types:** Deidentified participant data

**How to access data:** Participants were drawn from the Province of Ontario Neurodevelopmental Disorders (POND) network (exported April 2021; now available via a controlled data release through Ontario Brain Institute's Brain-CODE:

<https://www.braincode.ca/>) and the Healthy Brain Network (exported November 2020;

[http://fcon\\_1000.projects.nitrc.org/indi/cmi\\_healthy\\_brain\\_network/](http://fcon_1000.projects.nitrc.org/indi/cmi_healthy_brain_network/)) datasets.

**When available:** beginning date: 04-01-2021

### Supporting Documents

**Document types:** None

### Additional Information

**Who can access the data:** N/A

**Types of analyses:** N/A

**Mechanisms of data availability:** N/A
